# Supplementary material for: Introduction to the EQIPD quality system
Source: eLife journal article supplement (doi:10.7554/elife.63294), 2021-05-24
Supplement: supp [file elife-63294-supp-v1.zip]

Archive with 1 entries (1 files):
- elife_poa_e63294_Transparent_Reporting_File.pdf
